# Supplementary material
Source: ML conference proceedings conference paper supplement (https://proceedings.neurips.cc/paper_files/paper/2019/hash/af1c25e88a9e818f809f6b5d18ca02e2-Abstract.html)
Supplement: Supplementary file [file af1c25e88a9e818f809f6b5d18ca02e2-Supplemental.zip]

## A Proof of Main Result

We now give the proof of Theorem 5.1, which establishes identifiability, consistency, and asymptotic normality.

Recall our setup:

- $Y$ : outcome;  $T$ : treatment;  $Z$ : confounder.
- $Z$  is unobserved. We use some non-iid additional structure as a proxy.
- $(Y_i, T_i, Z_i) \stackrel{\text{iid}}{\sim} P$ .
- $Q(t, z) = \mathbb{E}[Y | t, z]$ ;  $g(Z) = P(T = 1 | Z)$
- The target parameter is the ATE,

$$\psi_0 = \mathbb{E}[Q(1, Z) - Q(0, Z)].$$

**The estimator and the algorithm.** Recall that we learn the nuisance parameters  $Q$ ,  $g$ , and the embeddings  $\lambda$  using a semi-supervised embedding-based predictor. We allow a slightly more general construction of the estimator than in the body of the paper. In the body, we state the result only for the A-IPTW. Here, we allow any estimator that solves the efficient estimating equations. This allows, for example, for targeted minimum loss based estimation.

Step 1. Form a  $K$ -fold partition; the splits are  $I_k, k = 1, \dots, K$ . For each set  $I_k$ , let  $I_k^c$  denote the units not in  $I_k$ .

Construct  $K$  estimators  $\check{\psi}(I_k^c), k = 1, \dots, K$ :

1. Estimate the nuisance parameters  $Q$ ,  $g$ , and the embedding  $\lambda$ :

$$\hat{\eta}(I_k^c) := (\hat{\lambda}_i, \tilde{g}_n(\cdot; \hat{\gamma}_n^{g, I_k^c}), \tilde{Q}_n(\cdot, \cdot; \hat{\gamma}_n^{Q, I_k^c}))$$

2.  $\check{\psi}(I_k^c)$  is a solution to the following equation:

$$\frac{1}{n_K} \sum_{i \in I_k} \varphi(Y_i, T_i, Z_i; \psi_0, \hat{\lambda}_i, \tilde{g}_n(\cdot; \hat{\gamma}_n^{g, I_k^c}), \tilde{Q}_n(\cdot, \cdot; \hat{\gamma}_n^{Q, I_k^c})) = 0,$$

where the  $\varphi(\cdot)$  function is the efficient score:

$$\begin{aligned} & \varphi(Y, T, Z; \psi_0, \lambda, \tilde{g}_n, \tilde{Q}_n) \\ &= \frac{T}{\tilde{g}_n(\lambda)} \{Y - \tilde{Q}_n(1, \lambda)\} - \frac{1 - T}{1 - \tilde{g}_n(\lambda)} \{Y - \tilde{Q}_n(0, \lambda)\} + \{\tilde{Q}_n(1, \lambda) - \tilde{Q}_n(0, \lambda)\} - \psi_0. \end{aligned}$$

We note that  $\varphi$  does not depend on the unobserved  $Z$ .

Step 2. The final estimator for the ATE  $\psi_0$  is

$$\tilde{\psi} = \frac{1}{K} \sum_{k=1}^K \check{\psi}(I_k^c).$$

**The theorem and the proof.**

**Assumption 1.** The probability distributions  $P$  satisfies

$$\begin{aligned} Y &= Q(T, Z) + \zeta, & \mathbb{E}[\zeta | Z, T] &= 0, \\ T &= g(Z) + \nu, & \mathbb{E}[\nu | Z] &= 0. \end{aligned}$$

**Assumption 2.** There is some function  $\lambda$  mapping features  $Z$  into  $\mathbb{R}^p$  such that  $\lambda$  satisfies the condition of Theorem 4.1, and

$$\|\tilde{Q}_n(d, \hat{\lambda}_{n,i}; \hat{\gamma}_{Q, I_k^c}^Q) - Q(d, \lambda(Z_i))\|_{P,2} + \|\tilde{g}_n(\hat{\lambda}_{n,i}; \hat{\gamma}_{g, I_k^c}^g) - g(\lambda(Z_i))\|_{P,2} \leq \delta_{n_K}. \quad (5.1)$$

Additionally,  $\lambda$  must satisfy all of the following assumptions.

423 **Assumption 3.** The following moment conditions hold for some fixed  $\varepsilon, C, c$ , some  $q > 4$ , and all  
 424  $t \in \{0, 1\}$

$$\begin{aligned} \|Q(t, \lambda(Z))\|_{P,q} &\leq C, \\ \|Y\|_{P,q} &\leq C, \\ P(\varepsilon \leq g(\lambda(Z)) \leq 1 - \varepsilon) &= 1, \\ P(\mathbb{E}_P[\zeta^2 | \lambda(Z)] \leq C) &= 1, \\ \|\zeta\|_{P,2} &\geq c, \\ \|\nu\|_{P,2} &\geq c. \end{aligned}$$

425 **Assumption 4.** The estimators of nuisance parameters satisfy the following accuracy requirements.  
 426 There is some  $\delta_n, \Delta_{n_K} \rightarrow 0$  such that for all  $n \geq 2K$  and  $d \in \{0, 1\}$  it holds with probability no  
 427 less than  $1 - \Delta_{n_K}$ :

$$\|\tilde{Q}_n(d, \hat{\lambda}_{n,i}; \hat{\gamma}_{Q,I_k^c}) - Q(d, \lambda(Z_i))\|_{P,2} \cdot \|\tilde{g}_n(\hat{\lambda}_{n,i}; \hat{\gamma}_{g,I_k^c}) - g(\lambda(Z_i))\|_{P,2} \leq \delta_{n_K} \cdot n_K^{-1/2} \quad (5.2)$$

428 And,

$$P(\varepsilon \leq \tilde{g}_n(\hat{\lambda}_{n,i}; \hat{\gamma}_{g,I_k^c}) \leq 1 - \varepsilon) = 1, \quad (5.3)$$

429 **Assumption 5.** We assume the dependence between the trained embeddings is not too strong: For  
 430 any  $i, j$  and all bounded continuous functions  $f$  with mean 0,

$$\mathbb{E} \left[ f(\hat{\lambda}_{n,i}) \cdot f(\hat{\lambda}_{n,j}) \right] = o\left(\frac{1}{n}\right). \quad (5.4)$$

431 **Theorem A.1 (Validity).** Denote the true ATE as

$$\psi_0 = \mathbb{E}_P[Q(1, Z) - Q(0, Z)].$$

432 Under Assumptions 1 to 5 the estimator  $\tilde{\psi}$  concentrates around  $\psi_0$  with the rate  $1/\sqrt{n}$  and is  
 433 approximately unbiased and normally distributed:

$$\begin{aligned} \sigma^{-1} \sqrt{n}(\tilde{\psi} - \psi_0) &\xrightarrow{d} \mathcal{N}(0, 1) \\ \sigma^2 &= \mathbb{E}_P[\varphi_0^2(W; \psi_0, \eta(\lambda(Z)))], \end{aligned}$$

434 where

$$\begin{aligned} W &= (Y, T, \lambda(Z)), \\ \eta(\lambda(Z)) &= (g(\lambda(Z)), Q(T, \lambda(Z))), \end{aligned}$$

435 and

$$\begin{aligned} &\varphi_0(Y, T, \lambda(Z); \psi_0, \eta(\lambda(Z))) \\ &= \frac{T}{g(\lambda(Z))} \{Y - Q(1, \lambda(Z))\} - \frac{1 - T}{1 - g(\lambda(Z))} \{Y - Q(0, \lambda(Z))\} + \{Q(1, \lambda(Z)) - Q(0, \lambda(Z))\} - \psi_0. \end{aligned}$$

436 *Proof.* We prove the result for the special case where  $\lambda$  is the identity map. By Assumption 2 this is  
 437 without loss of generality—it's the case where all of the information in  $Z$  is relevant for prediction.  
 438 This is not an important mathematical point, but substantially simplifies notation.

439 The proof follow the same idea as in Chernozhukov *et al.* [Che+17b] with a few modifications  
 440 accounting for the non-iid proxy structure.

441 We start with some notation.

442 1.  $\|\cdot\|_{P,q}$  denotes the  $L_q(P)$  norm. For example, for measurable  $f : \mathcal{W} \rightarrow \mathbb{R}$ ,

$$\|f(W)\|_{P,q} := \left( \int |f(w)|^q dP(w) \right)^{1/q}.$$

443 2. The empirical process  $\mathbb{G}_{n,I}(f(W))$  for  $\|f(W_i)\|_{P,2} < \infty$  is

$$\mathbb{G}_{n,I}(f(W)) := \frac{1}{\sqrt{n}} \sum_{i \in I} (f(W_i) - \int f(w) dP(w)).$$

444 3. The empirical expectation and probability is

$$\mathbb{E}_{n,I} [f(W)] := \frac{1}{n} f(W_i); \quad \mathbb{P}_{n,I}(A) := \frac{1}{n} \sum_{i \in I} 1(W_i \in A).$$

445 Let  $\mathbb{P}_n$  be the empirical measure.

446 Step 1: (Main Step). Letting  $\check{\psi}_k = \check{\psi}(I_k^c)$ , we first write

$$\sqrt{n}(\check{\psi}_k - \psi_0) = \mathbb{G}_{n,I_k^c} \varphi(W; \psi_0, \hat{\eta}(I_k^c)) + \sqrt{n} \int \varphi(w; \psi_0, \hat{\eta}(I_k^c)) d\mathbb{P}_n(w), \quad (\text{A.1})$$

447 where

$$\hat{\eta}(I_k^c) := \left( \hat{\lambda}_i, \tilde{g}_n(\cdot; \hat{\gamma}_n^{g,I_k^c}), \tilde{Q}_n(\cdot, \cdot; \hat{\gamma}_n^{Q,I_k^c}) \right)$$

448 as is defined earlier.

449 Steps 2 and 3 below demonstrate that for each  $k = 1, \dots, K$ ,

$$\int (\varphi(w; \psi_0, \hat{\eta}(I_k^c)) - \varphi_0(w; \psi_0, \eta(z)))^2 d\mathbb{P}_n(w) = o_{\mathbb{P}_n}(1), \quad (\text{A.2})$$

450 and that

$$\sqrt{n} \int \varphi(w; \psi_0, \hat{\eta}(I_k^c)) d\mathbb{P}_n(w) = o_{\mathbb{P}_n}(1). \quad (\text{A.3})$$

451 (A.2) implies

$$\mathbb{G}_{n,I_k^c} (\varphi(w; \psi_0, \hat{\eta}(I_k^c)) - \varphi_0(w; \psi_0, \eta(z))) = o_{\mathbb{P}_n}(1)$$

452 due to Lemma B.1 of Chernozhukov *et al.* [Che+17b] and the Chebychev's inequality.

453 We note that  $\hat{\eta}(I_k^c) = \left( \hat{\lambda}_i, \tilde{g}_n(\cdot; \hat{\gamma}_n^{g,I_k^c}), \tilde{Q}_n(\cdot, \cdot; \hat{\gamma}_n^{Q,I_k^c}) \right)$ , where the embedding  $\hat{\lambda}_i$ 's are not independent. By contrast,  $\eta(z)$  only depends on  $Z_i$  where all  $Z_i$ 's are independent.

455 We next show  $\sigma^{-1} \sqrt{nK}(\check{\psi}_k - \psi_0)_{k=1}^K = \sigma^{-1} \mathbb{G}_{n,I_k^c} \varphi_0(W; \psi_0, \eta(Z))_{k=1}^K + o_{\mathbb{P}_n}(1)$ .

456 First, we notice

$$\begin{aligned} & \mathbb{E} \left[ [\sqrt{nK}(\check{\psi}_k - \psi_0) - \mathbb{G}_{n,I_k^c} \varphi_0(W; \psi_0, \eta(Z))]^2 \mid I_k^c \right] \\ &= \mathbb{E} \left[ [\mathbb{G}_{n,I_k^c} \varphi(W; \psi_0, \hat{\eta}(I_k^c)) - \mathbb{G}_{n,I_k^c} \varphi_0(W; \psi_0, \eta(Z)) + o_{\mathbb{P}_n}(1)]^2 \mid I_k^c \right] \\ &= \mathbb{E} \left[ (\mathbb{G}_{n,I_k^c} \varphi(W; \psi_0, \hat{\eta}(I_k^c)))^2 \mid I_k^c \right] + \mathbb{E} \left[ (\mathbb{G}_{n,I_k^c} \varphi_0(W; \psi_0, \eta(Z)))^2 \mid I_k^c \right] \\ & \quad - 2 \mathbb{E} \left[ (\mathbb{G}_{n,I_k^c} \varphi(W; \psi_0, \hat{\eta}(I_k^c))) \cdot (\mathbb{G}_{n,I_k^c} \varphi_0(W; \psi_0, \eta(Z))) \mid I_k^c \right] + o_{\mathbb{P}_n}(1) \end{aligned}$$

457 The first equality is due to (A.1) and (A.2). The second equality is due to

$$\mathbb{E} [\mathbb{G}_{n,I_k^c} \varphi(W; \psi_0, \hat{\eta}(I_k^c))] = \mathbb{E} [\mathbb{G}_{n,I_k^c} \varphi_0(W; \psi_0, \eta(Z))] = 0. \quad (\text{A.4})$$

458 If we write  $\bar{\varphi}(W_i) := \varphi(W_i) - \int \varphi(w) d\mathbb{P}_n(w)$ , we have

$$\begin{aligned} & \mathbb{E} \left[ [\sqrt{nK}(\check{\psi}_k - \psi_0) - \mathbb{G}_{n,I_k^c} \varphi_0(W; \psi_0, \eta(Z))]^2 \mid I_k^c \right] \\ &= \frac{1}{n} \mathbb{E} \left[ \sum_{i,j=1}^{n_K} \bar{\varphi}(W_i; \psi_0, \hat{\eta}(I_k^c)) \cdot \bar{\varphi}(W_j; \psi_0, \eta(I_k^c)) \mid I_k^c \right] \\ & \quad + \frac{1}{n} \mathbb{E} \left[ \sum_{i,j=1}^{n_K} \bar{\varphi}_0(W_i; \psi_0, \eta(Z_i)) \cdot \bar{\varphi}_0(W_j; \psi_0, \hat{\eta}(Z_j)) \right] \\ & \quad - 2 \mathbb{E} \left[ (\mathbb{G}_{n,I_k^c} \varphi(W; \psi_0, \hat{\eta}(I_k^c)) \mid I_k^c) \cdot \mathbb{E} [\mathbb{G}_{n,I_k^c} \varphi_0(W; \psi_0, \eta(Z))] \right] + o_{\mathbb{P}_n}(1) \\ &= \frac{1}{n} \sum_{i,j=1}^{n_K} o\left(\frac{1}{n}\right) + \frac{1}{n} \sum_{i,j=1}^{n_K} \mathbb{E} [\bar{\varphi}_0(W_i; \psi_0, \eta(Z_i))] \cdot \mathbb{E} [\bar{\varphi}_0(W_j; \psi_0, \hat{\eta}(Z_j))] + o_{\mathbb{P}_n}(1) \\ &= o_{\mathbb{P}_n}(1) \end{aligned}$$

459 The second equality is due to Assumption 5, the independence of  $W_i$ 's, and (A.4).

460 By Lemma B.1 of Chernozhukov *et al.* [Che+17b],

$$\mathbb{E} [\sqrt{n_K}(\check{\psi}_k - \psi_0) - \mathbb{G}_{n, I_k^c} \varphi_0(W; \psi_0, \eta(Z))]^2 \mid I_k^c = o_{\mathbb{P}_n}(1)$$

461 implies

$$\sqrt{n_K}(\check{\psi}_k - \psi_0) - \mathbb{G}_{n, I_k^c} \varphi_0(W; \psi_0, \eta(Z)) = o_{\mathbb{P}_n}(1)$$

462 Therefore, we have

$$\sigma^{-1} \sqrt{n_K}(\check{\psi}_k - \psi_0)_{k=1}^K = \sigma^{-1} \mathbb{G}_{n, I_k^c} \varphi_0(W; \psi_0, \eta(Z))_{k=1}^K + o_{\mathbb{P}_n}(1) \xrightarrow{d} (\mathcal{N}_k)_{k=1}^K$$

463 where  $(\mathcal{N}_k)_{k=1}^K$  is a Gaussian vector with independent  $\mathcal{N}(0, 1)$  coordinates. Using the independence  
464 of  $Z_i$ 's and the central limit theorem, we have

$$\begin{aligned} & \sigma^{-1} \sqrt{n}(\check{\psi} - \psi_0) \\ &= \sigma^{-1} \sqrt{n} \left( \frac{1}{K} \sum_{k=1}^K (\check{\psi}_k - \psi_0) \right) \\ &= \frac{1}{K} \sigma^{-1} \sum_{k=1}^K \mathbb{G}_{n, I_k^c} \varphi_0(W; \psi_0, \eta(Z)) + o_{\mathbb{P}_n}(1) \\ &\xrightarrow{d} \frac{1}{K} \sum_{k=1}^K \mathcal{N}_k = \mathcal{N}(0, 1). \end{aligned}$$

465 Step 2: This step demonstrates (A.2). Observe that for some constant  $C_\varepsilon$  that depends only on  $\varepsilon$  and  $\mathcal{P}$ ,

$$\|\varphi(W; \psi_0, \hat{\eta}(I_k^c)) - \varphi(W; \psi_0, \eta(Z))\|_{\mathbb{P}_{n,2}} \leq C_\varepsilon (\mathcal{I}_1 + \mathcal{I}_2 + \mathcal{I}_3),$$

466 where

$$\begin{aligned} \mathcal{I}_1 &= \max_{d \in \{0,1\}} \|\tilde{Q}_n(d, Z; \hat{\gamma}_n^{Q, I_k^c}) - Q(d, Z)\|_{\mathbb{P}_{n,2}}, \\ \mathcal{I}_2 &= \left\| \frac{T(Y - \tilde{Q}_n(1, \lambda; \hat{\gamma}_n^{Q, I_k^c}))}{\tilde{g}_n(\cdot; \hat{\gamma}_n^{g, I_k^c})} - \frac{T(Y - Q(1, Z))}{g(\lambda)} \right\|_{\mathbb{P}_{n,2}}, \\ \mathcal{I}_3 &= \left\| \frac{(1-T)(Y - \tilde{Q}_n(0, \lambda; \hat{\gamma}_n^{Q, I_k^c}))}{1 - \tilde{g}_n(\cdot; \hat{\gamma}_n^{g, I_k^c})} - \frac{(1-T)(Y - Q(0, Z))}{1 - g(\lambda)} \right\|_{\mathbb{P}_{n,2}}, \end{aligned}$$

467 We bound  $\mathcal{I}_1, \mathcal{I}_2$ , and  $\mathcal{I}_3$  in turn. First,  $\mathbb{P}_n(\mathcal{I}_1 > \delta_{n_K}) \leq \Delta_{n_K} \rightarrow 0$  by Assumption 4, and so  
468  $\mathcal{I}_1 = o_{\mathbb{P}_n}(1)$ . Also, on the event that

$$\mathbb{P}_n(\varepsilon \leq \tilde{g}_n(Z; I_k^c) \leq 1 - \varepsilon) = 1 \tag{A.5}$$

$$\|\tilde{Q}_n(1, \lambda; \hat{\gamma}_n^{Q, I_k^c}) - Q(1, Z)\|_{\mathbb{P}_{n,2}} + \|\tilde{g}_n(\cdot; \hat{\gamma}_n^{g, I_k^c}) - g(Z)\|_{\mathbb{P}_{n,2}} \leq \delta_{n_K}, \tag{A.6}$$

469 which happens with  $\mathbb{P}_{\mathbb{P}_n}$ -probability at least  $1 - \Delta_{n_K}$  by Assumption 4,

$$\begin{aligned} \mathcal{I}_2 &\leq \varepsilon^{-2} \|Tg(Z)(Y - \tilde{Q}_n(1, \lambda; \hat{\gamma}_n^{Q, I_k^c})) - T\tilde{g}_n(Z; I_k^c)(Y - Q(1, Z))\|_{\mathbb{P}_{n,2}} \\ &\leq \varepsilon^{-2} \|g(Z)(Q(1, Z) + \zeta - \tilde{Q}_n(1, \lambda; \hat{\gamma}_n^{Q, I_k^c})) - \tilde{g}_n(Z; I_k^c)\zeta\|_{\mathbb{P}_{n,2}} \\ &\leq \varepsilon^{-2} \|g(Z)(\tilde{Q}_n(1, \lambda; \hat{\gamma}_n^{Q, I_k^c}) - Q(1, Z))\|_{\mathbb{P}_{n,2}} + \|(\tilde{g}_n(Z; I_k^c) - g(Z))\zeta\|_{\mathbb{P}_{n,2}} \\ &\leq \varepsilon^{-2} \|\tilde{Q}_n(1, \lambda; \hat{\gamma}_n^{Q, I_k^c}) - Q(1, Z)\|_{\mathbb{P}_{n,2}} + \sqrt{C} \|\tilde{g}_n(Z; I_k^c) - g(Z)\|_{\mathbb{P}_{n,2}} \\ &\leq \varepsilon^{-2} (\delta_{n_K} + \sqrt{C} \delta_{n_K}) \rightarrow 0, \end{aligned}$$

470 where the first inequality follows from (A.5) and Assumption 4, the second from the facts that  
471  $T \in \{0, 1\}$  and for  $T = 1, Y = Q(1, Z) + \zeta$ , the third from the triangle inequality, the fourth from  
472 the facts that  $\mathbb{P}_n(g(Z) \leq 1) = 1$  and  $\mathbb{P}_n(\mathbb{E}_{\mathbb{P}_n}[\zeta^2 \mid Z] \leq C) = 1$  in Assumption 3, the fifth from

473 (A.6), and the last assertion follows since  $\delta_{n_K} \rightarrow 0$ . Hence,  $\mathcal{I}_2 = o_{\mathbb{P}_n}(1)$ . In addition, the same  
 474 argument shows that  $\mathcal{I}_3 = o_{\mathbb{P}_n}(1)$ , and so (A.2) follows.

475 Step 3: This step demonstrates (A.3). Observe that since  $\psi_0 = \mathbb{E}_{\mathbb{P}_n} [Q(1, Z) - Q(0, Z)]$ , the left-  
 476 hand side of (A.3) is equal to

$$\begin{aligned} \mathcal{I}_4 = & \sqrt{n} \int \frac{\tilde{g}_n(Z; I_k^c) - g(z)}{\tilde{g}_n(Z; I_k^c)} \cdot (\tilde{Q}_n(1, \lambda; \hat{\gamma}_n^{Q, I_k^c}) - Q(1, z)) \\ & + \frac{\tilde{g}_n(Z; I_k^c) - g(z)}{1 - \tilde{g}_n(Z; I_k^c)} \cdot (Q(0, z; I_k^c) - Q(0, z)) d\mathbb{P}_n(z). \end{aligned}$$

477 But on the event that

$$\mathbb{P}_n(\varepsilon \leq \tilde{g}_n(Z; I_k^c) \leq 1 - \varepsilon) = 1$$

478 and

$$\max_{d \in \{0, 1\}} \|\tilde{Q}_n(d, \lambda; \hat{\gamma}_n^{Q, I_k^c}) - Q(d, Z)\|_{\mathbb{P}_n, 2} \cdot \|\tilde{g}_n(Z; I_k^c) - g(Z)\|_{\mathbb{P}_n, 2} \leq \delta_{n_K} \cdot n_K^{-1/2},$$

479 which happens with  $\mathbb{P}_n$ -probability at least  $1 - \Delta_{n_K}$  by Assumption 4, the Cauchy-Schwarz inequality  
 480 implies that

$$\mathcal{I}_4 \leq \frac{2\sqrt{n}}{\varepsilon} \max_{d \in \{0, 1\}} \|\tilde{Q}_n(d, \lambda; \hat{\gamma}_n^{Q, I_k^c}) - Q(d, Z)\|_{\mathbb{P}_n, 2} \cdot \|\tilde{g}_n(Z; I_k^c) - g(Z)\|_{\mathbb{P}_n, 2} \leq \frac{2\delta_{n_K}}{\varepsilon} \rightarrow 0,$$

481 which gives (A.3).

482

□
